# Supplementary material for: Professionals' Views and Experiences of Using Rehabilitation Robotics With Stroke Survivors: A Mixed Methods Survey
Source: PubMed Central journal article supplement (PMC8757825; doi:10.3389/fmedt.2021.780090), 2021-11-11

**Supplementary material 4. Respondents' responses to the question "Which type of patients do you think rehabilitation robots will be most helpful for?"**

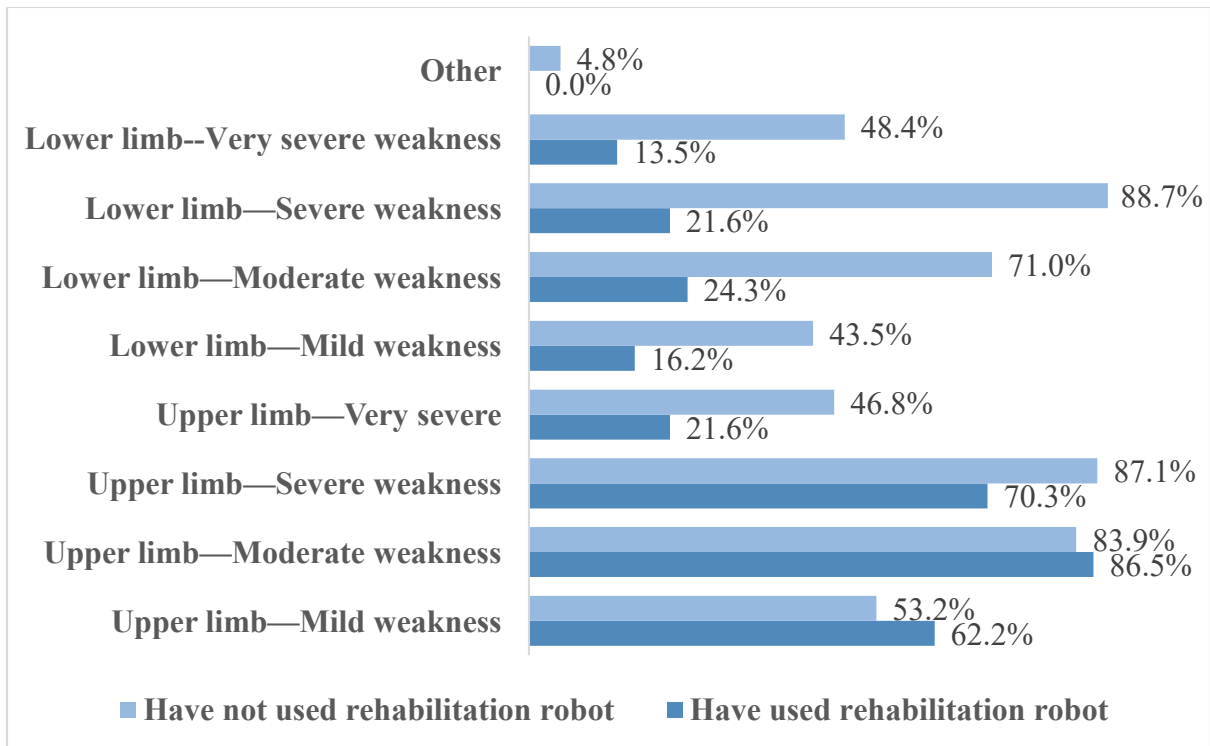

Supplement: Data_Sheet_4.pdf [file Data_Sheet_4.pdf]
